# Supplementary material
Source: HighWire-hosted journal article supplement (https://jnm.snmjournals.org/highwire/filestream/95282/field_highwire_adjunct_files/0/202614_Supplemental_Data.pdf)
Supplement: 202614_Supplemental_Data.pdf [file 202614_Supplemental_Data.pdf]

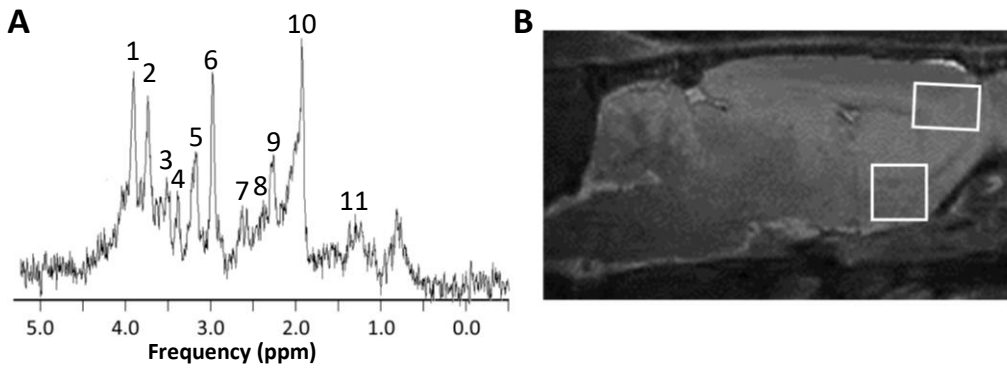

**Supplemental Figure 1.** A) Example of a spectrum obtained from the prefrontal nucleus voxel. 1 = Creatine; 2 = Ascorbate, glutamine, glutamate, glutathione; 3 = myo-inositol; 4 = Taurine; 5 = Taurine, glycerophosphocholine, phosphocholine; 6 = Creatine, 7 = Aspartate, N-acetylaspartate; 8 = N-acetylaspartate, glutamine; 9 = glutamate; 10 = N-acetylaspartate; 11 = Alanine, lactate. B) Illustration of voxel position for spectroscopy on a sagittal image.
